# Supplementary material for: Navigation and selection of spermatozoa in a radial flow microfluidic device
Source: Royal Society of Chemistry journal article supplement (doi:10.1039/d5lc00778j), 2025-11-27
Supplement: d5lc00778j10.pdf [file d5lc00778j10.pdf]

*Supplementary materials for*

**Navigation and selection of spermatozoa in a radial flow microfluidic device**

Ali Karimi, Xieergai Jiang, Alireza Abbaspourrad\*

Department of Food Science and Technology, Cornell University, Ithaca, NY 14853, USA.

\*Corresponding author: [alireza@cornell.edu](mailto:alireza@cornell.edu)

**Supplementary Notes:**

- **Note 1:** Modeling of sperm navigation with various propulsive velocities in radial flow
- **Note 2:** Design of sperm unidirectional navigation (SUN) chip
- **Note 3:** Operation of SUN chip

**Supplementary Figures:**

- **Figure S1.** Navigation of sperm with variable propulsive velocities obtained from mathematical modeling
- **Figure S2.** Design of SUN chip and dimensions of each region
- **Figure S3.** Operation of SUN chip

**Supplementary Movies:**

- **Movie S1.** Sperm trajectory under radial flow with local strength of  $\chi = 0.5 \chi_c$  obtained from mathematical modeling
- **Movie S2.** Sperm trajectory under radial flow with local strength of  $\chi = 2 \chi_c$  obtained from mathematical modeling
- **Movie S3.** Sperm trajectory under radial flow with local strength of  $\chi = 4 \chi_c$  obtained from mathematical modeling
- **Movie S4.** Sperm trajectory under radial flow with local strength of  $\chi = 8 \chi_c$  obtained from mathematical modeling
- **Movie S5.** Time lapse of washing step using dyed water
- **Movie S6.** Sperm navigation in barrier of ring I
- **Movie S7.** Sperm navigation in barrier of ring II
- **Movie S8.** Sperm navigation in barrier of ring III
- **Movie S9.** Sperm motion in proximity of barrier ring III comet

**Note 1: Modeling of sperm navigation with various propulsive velocities in radial flow**

We ran the simulations for the same radial flow strength but considering sperm cells with various propulsive velocities ( $v_p$ ) ranging from  $0 \mu\text{m s}^{-1}$  (considered as dead cell or debris) to  $100 \mu\text{m s}^{-1}$  (considered as progressively motile bovine sperm). Dead sperm and cells with motility less than  $60 \mu\text{m s}^{-1}$  are swept away by the flow to the outer boundary (**Figure S1 a-f**).

Sperm with  $v_s$  of  $60 \mu\text{m s}^{-1}$  showed a notable navigation pattern (**Figure S1 g**). They first are swept away by the flow but gradually reorient themselves and start swimming toward the center (**Figure S1 h**). Obviously, this procedure slows down their navigation compared to the higher flow rate. Cells with propulsive velocity faster than  $80 \mu\text{m s}^{-1}$  showed rotary rheotaxis; due to local flow conditions, sperm start to rotate while progressively moving toward the center.

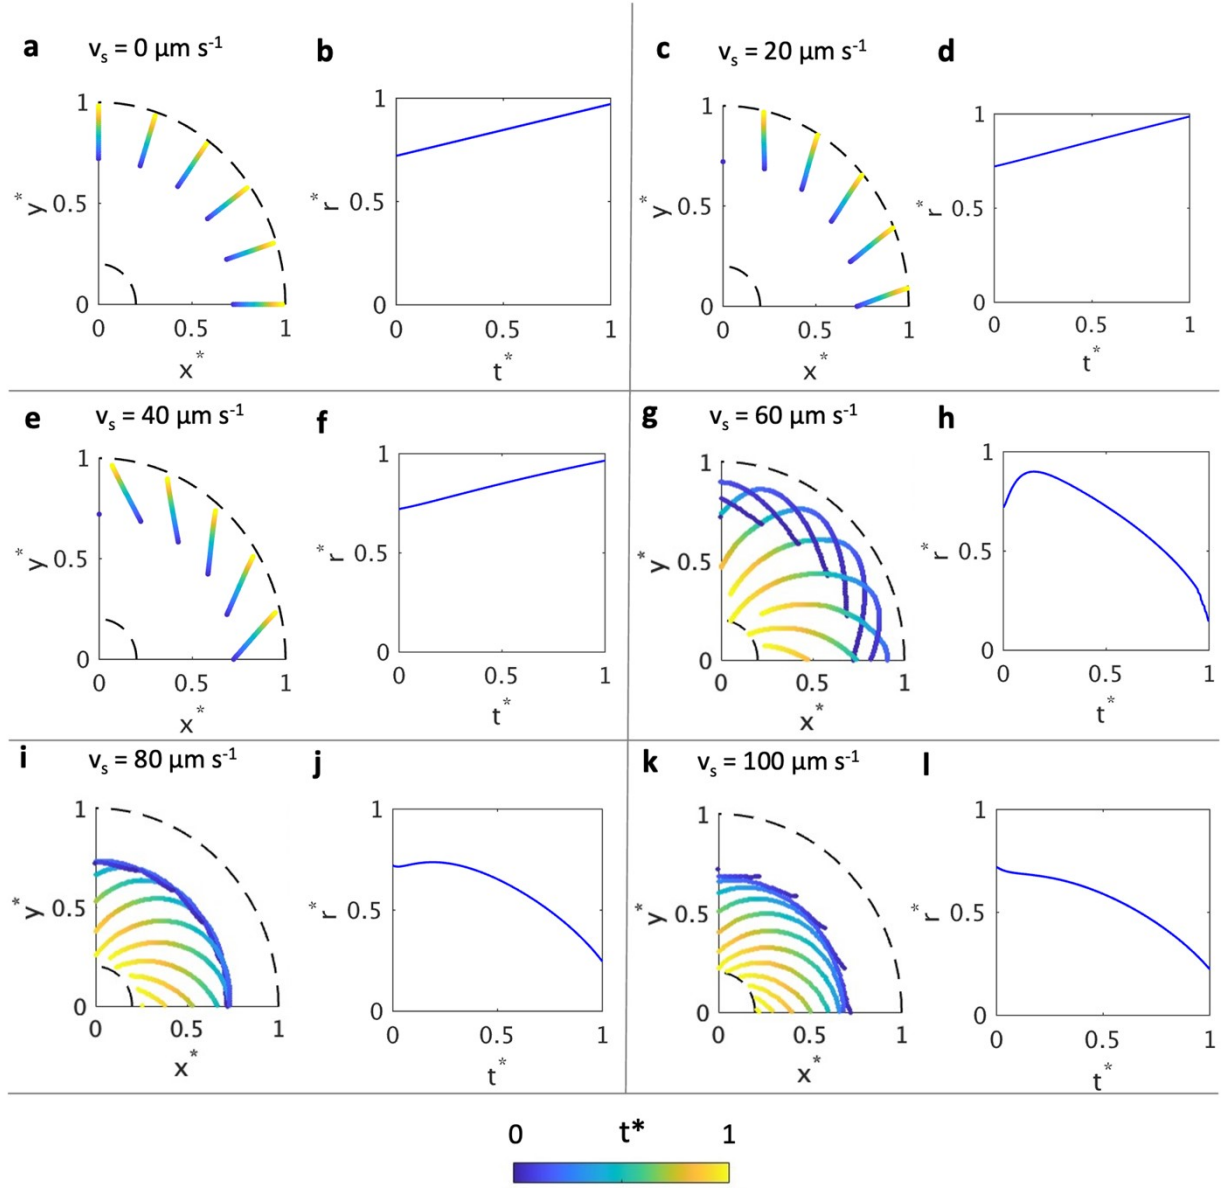

**Figure S1.** Mathematical modeling of sperm with various intrinsic propulsive velocities of 0  $\mu\text{m s}^{-1}$  or dead sperm(a and b), 20  $\mu\text{m s}^{-1}$  (c and d), 40  $\mu\text{m s}^{-1}$ (e and f), 60  $\mu\text{m s}^{-1}$ (g and h), 80  $\mu\text{m s}^{-1}$ (i and j), 100  $\mu\text{m s}^{-1}$ (k and l), identical radial flow equivalent to  $\gamma = 3 \gamma_c$ . The shape of  $r^*$  versus  $t^*$  plot describes the behavior of microswimmer in the flow field. Time and dimensions are normalized with respect to their maximum values for enhanced visualization. Sperm location at each time step is color-coded indicating the time progression.

## **Note 2: Design of sperm unidirectional navigation (SUN) chip**

Design specifications of each section of SUN chip is provided in **Fig. S2**. Regions of the chip are: (1) Inlet port where sperm are prevented from entering the washing medium stream through excess shear rate and modulated sperm-barrier interaction (**Fig. S2a**), (2) Capture and reorienting barriers with a gap size of  $100\ \mu\text{m}$  and apex angle of  $45^\circ$  (**Fig. S2b**), (3) Second ring of capture and reorienting barriers with extended tail for enhanced capture of sperm from bulk semen (**Fig. S2c**), and (4) Outlet funnel where the shear rate gradient provides the last chance for sperm to reorient toward flow origin and remain in the chip before being washed out by flow (**Fig. S2d**).

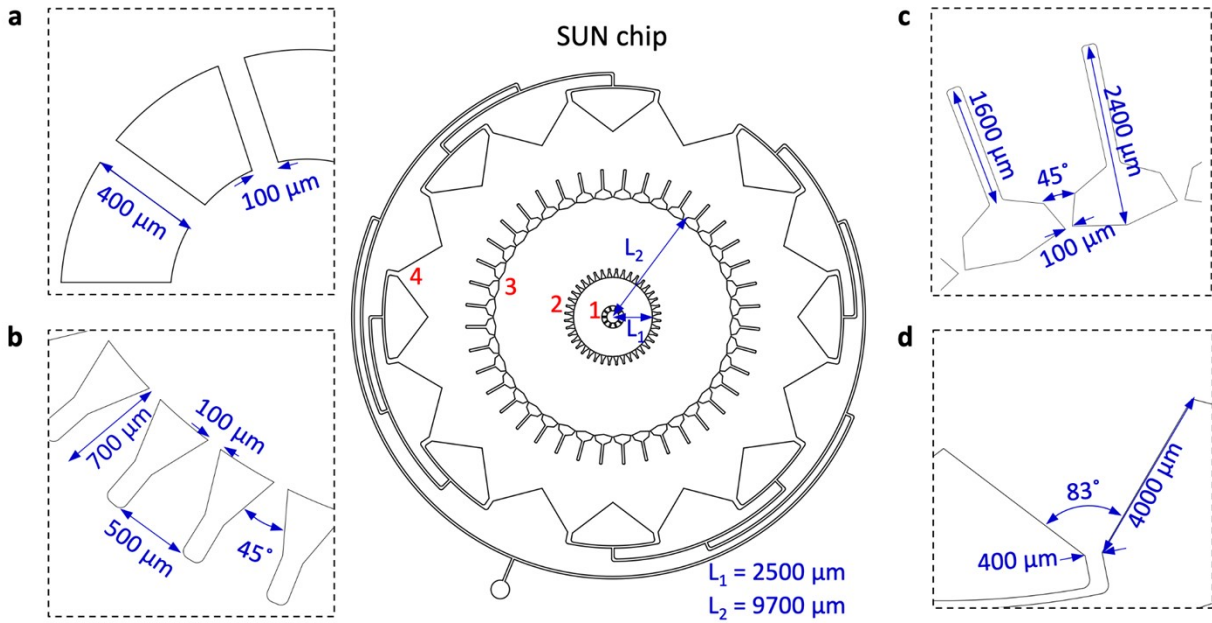

**Fig. S2** Design of SUN chip and dimensions of each region: (a) region 1, (b) region 2, (c) regions 3, and (d) region 4.

### **Note 3: Operation of SUN chip**

The operation of sperm unidirectional navigation (SUN) chip consists of three simple steps: 1) filling the chip with raw semen sample, 2) washing the sample with medium to remove the dead cells and debris and maintaining motile sperm inside the chip using a syringe pump, and 3) Extracting the remaining sperm inside the chip by a pipette (**Figure S3a**). To quantify the washing step, we simulated the process by using dyed water representing the semen sample and washing the chip with water. We consequently captured images from chip every 1 s; and the results showed highly distributed flow inside the chip resulted from the radial design and flow distributors(**Figure S3b**).

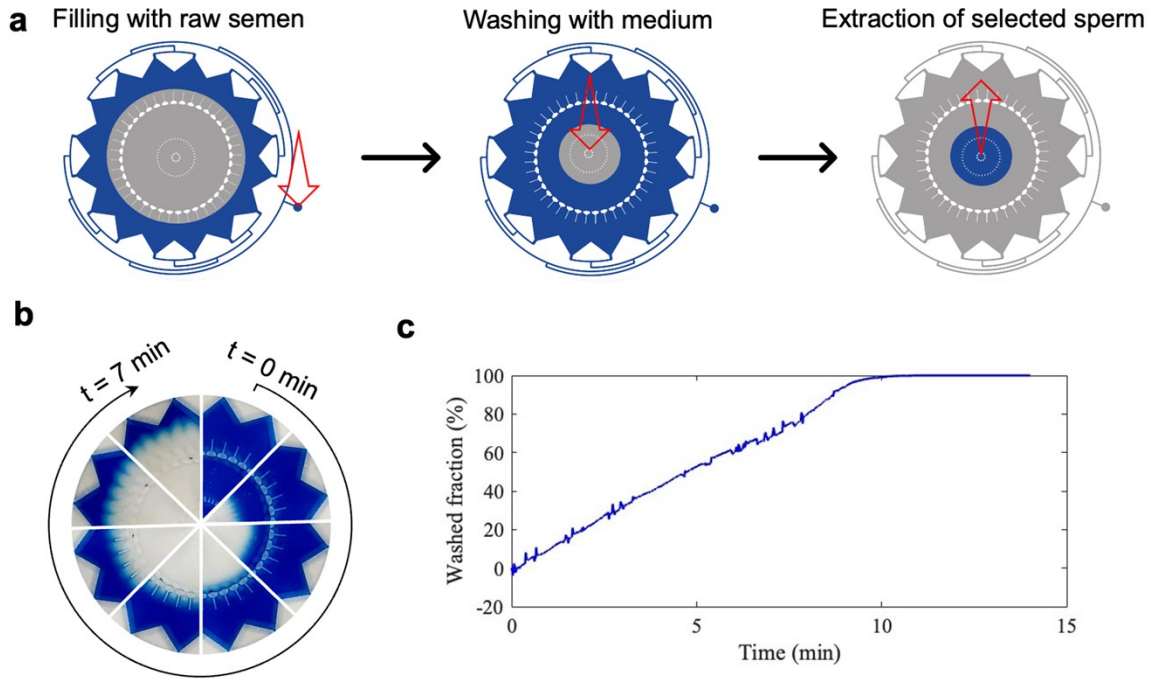

**Figure S3.** Operation of sperm unidirectional navigation chip. (a) operational steps of sperm selection using sperm unidirectional navigation chip. (b) washing time lapse snapshots of chip under flow rate  $Q = 1000 \mu\text{lhr}^{-1}$ . (c) quantification of washing step by pixel intensity analysis. The washing is accomplished after approximately 10 minutes.

We quantified the washing step by measuring the average pixel intensity of each frame and estimating the washed fraction by  $[1 - (\text{average intensity} - \text{initial average intensity}) / (\text{initial average intensity})] * 100$  using a MATLAB code. By plotting the washed fraction over time for a washing with flow rate of  $1 \text{ mL hr}^{-1}$ , the washing dynamics is identified (**Figure S3c**). Complete washing was achieved by approximately 9 min of medium flow corresponding to a dispensed volume of  $150 \mu\text{L}$ . In the case of a real semen sample, due to its particulate nature because of proteins and other bioparticles presence, we assumed a total flow dispensed equal to  $300 \mu\text{L}$  (correction factor of 2 compared to dyed water experiment).
